# Supplementary material
Source: publisher site journal article supplement (https://mycokeys.pensoft.net/article/27014/download/suppl/33/)
Supplement: Supplementary file

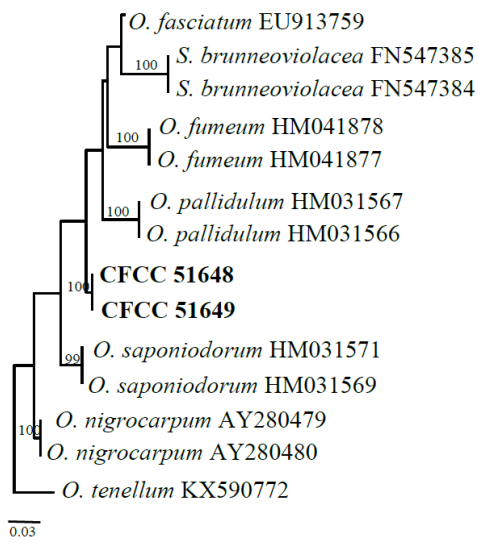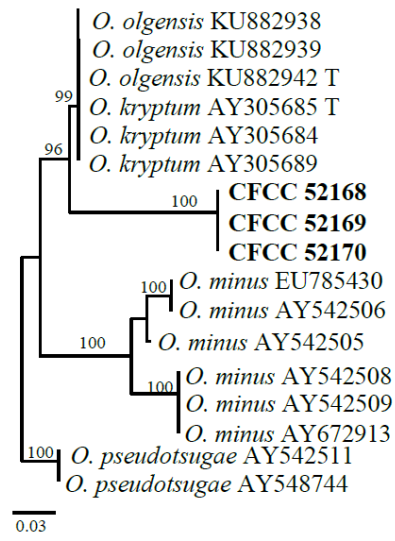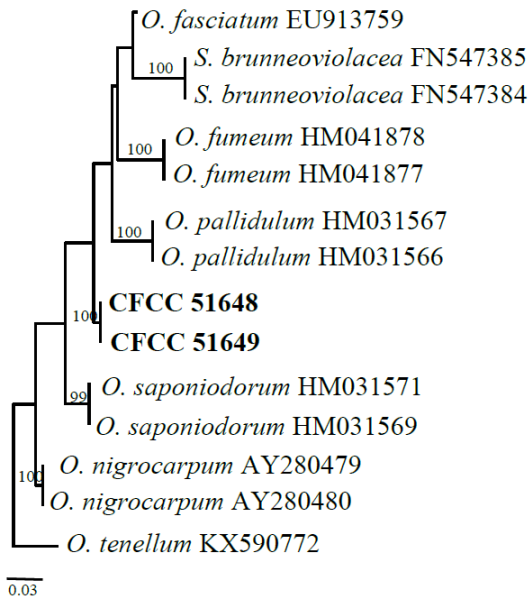

Appendix Fig 3: Three ML phylogenetic trees based on *tub2* after excluding introns.
